# Supplementary material for: Microfluidic Screening Reveals Heparan Sulfate Enhances Human Mesenchymal Stem Cell Growth by Modulating Fibroblast Growth Factor‐2 Transport
Source: PubMed Central journal article supplement (PMC5442852; doi:10.1002/sctm.16-0343), 2017-02-16
Supplement: SCT3-6-1178-s001.pdf [file SCT3-6-1178-s001.pdf]

# Microfluidic Screening Reveals Heparan Sulfate Enhances Human Mesenchymal Stem Cell Growth by Modulating FGF-2 Transport

## Supplementary Information

Drew M. Titmarsh<sup>1</sup>, Clarissa L.L. Tan<sup>1</sup>, Nick R. Glass<sup>2</sup>, Victor Nurcombe<sup>1,3</sup>, Justin J. Cooper-White<sup>2,4,5</sup>, and Simon M. Cool<sup>1,6\*</sup>

<sup>1</sup>Institute of Medical Biology, Agency for Science Technology and Research (A\*STAR), 8A Biomedical Grove, #06-06 Immunos, SINGAPORE 138648.

<sup>2</sup>Australian Institute for Bioengineering & Nanotechnology, The University of Queensland, St. Lucia, QLD 4072, AUSTRALIA.

<sup>3</sup>Lee Kong Chian School of Medicine, Nanyang Technological University–Imperial College London, SINGAPORE 308232.

<sup>4</sup>School of Chemical Engineering, The University of Queensland, St. Lucia, QLD 4072, AUSTRALIA.

<sup>5</sup>Biomedical Manufacturing, Manufacturing Flagship, CSIRO, Clayton, Victoria 3169, AUSTRALIA.

<sup>6</sup>Department of Orthopaedic Surgery, Yong Loo Lin School of Medicine, National University of Singapore, SINGAPORE 119074.

\*Corresponding author:

Simon Cool, PhD

Institute of Medical Biology

8A Biomedical Grove, #06-06 Immunos, SINGAPORE 138648

Tel +65-64070176 Fax: +65-64789477

Email: [simon.cool@imb.a-star.edu.sg](mailto:simon.cool@imb.a-star.edu.sg)

## SUPPLEMENTARY FIGURES

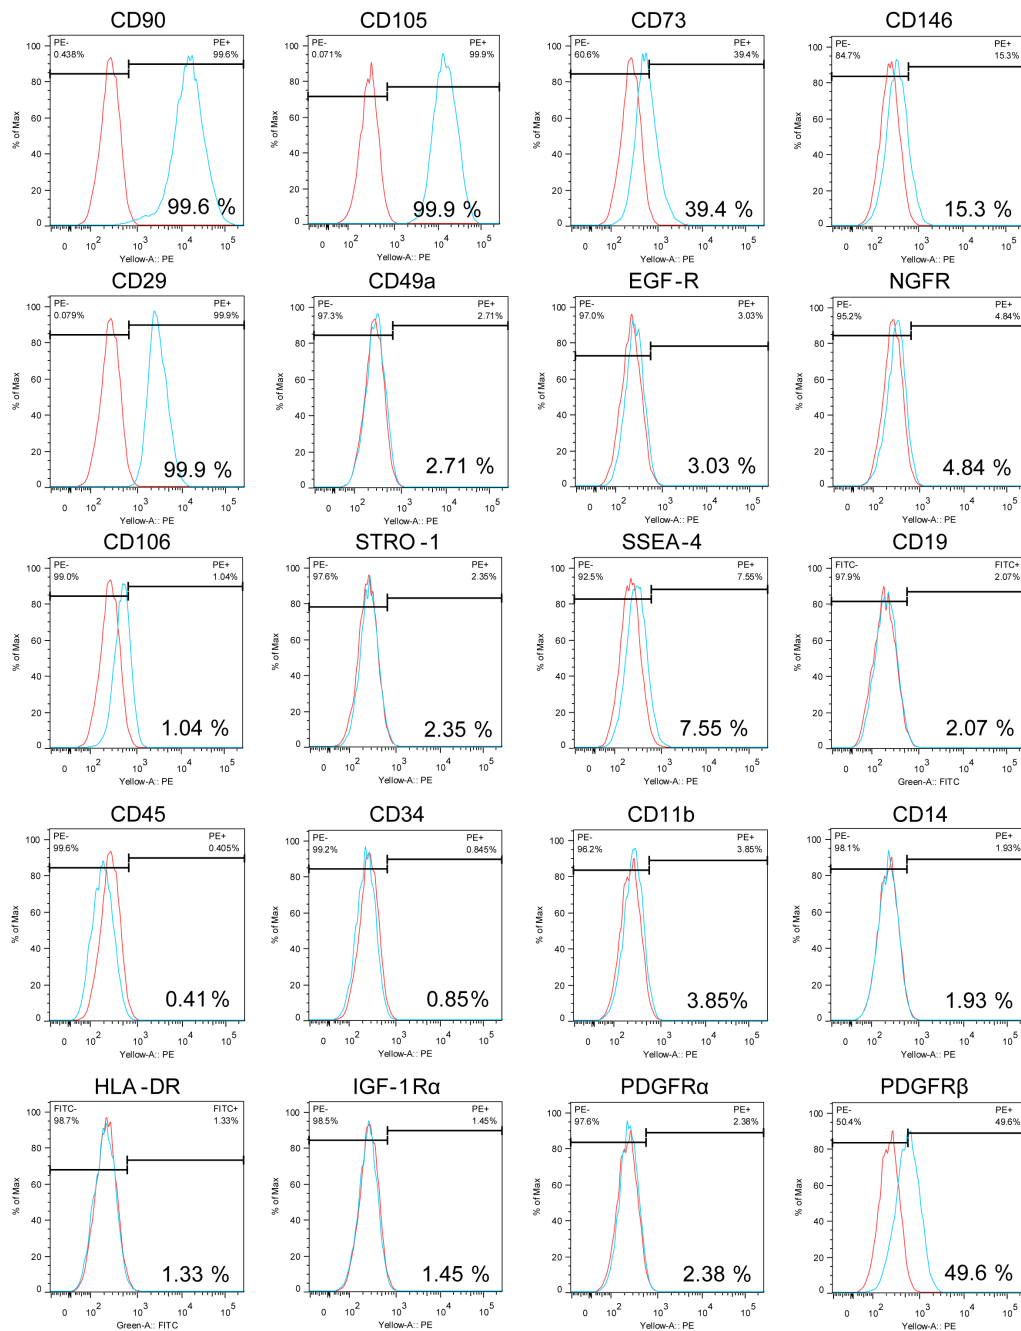

**Supplementary Figure 1 – Flow Cytometric Immunophenotyping of hMSCs derived from Donor B.**

Cells were fixed at passage 6 and analysed by flow cytometry for a range of markers including hMSC markers CD90, CD105 and CD73, hematopoietic markers CD45, CD34, CD11b, CD14 and HLA-DR. Percentage positive cells are marked. The cutoff was set for a false-positive rate of < 2%, based on the relevant isotype control.

A

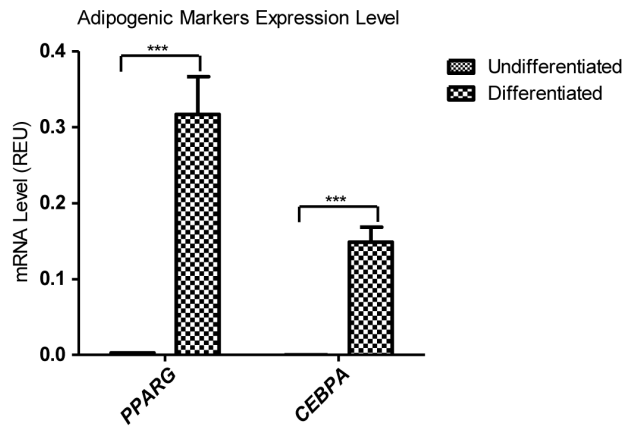

B

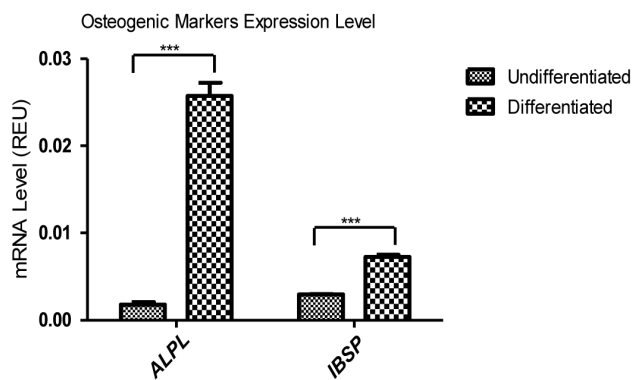

C

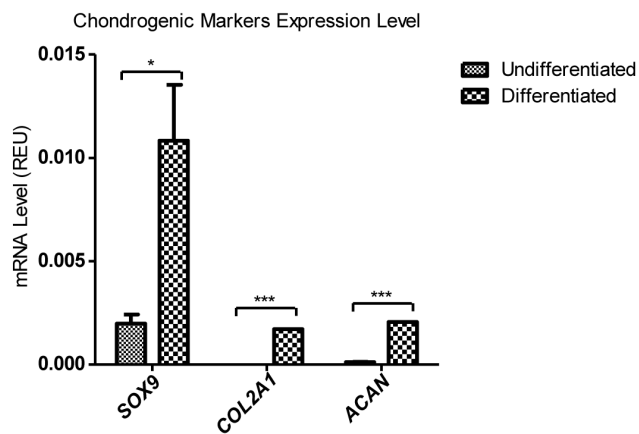

**Supplementary Figure 2 - RT-qPCR Quantification of Expression of Multi-lineage Differentiation Markers by hMSCs derived from Donor B.** A Adipogenic markers, B osteogenic markers, and C chondrogenic markers were evaluated from RNA taken from undifferentiated and differentiated cells from Donor B. Columns represent mean mRNA level in relative expression units to reference gene *ACTB*, +/- S.D. of triplicate cultures, \* -  $p < 0.05$  and \*\*\* -  $p < 0.001$  by unpaired Student's *t*-test for each gene.

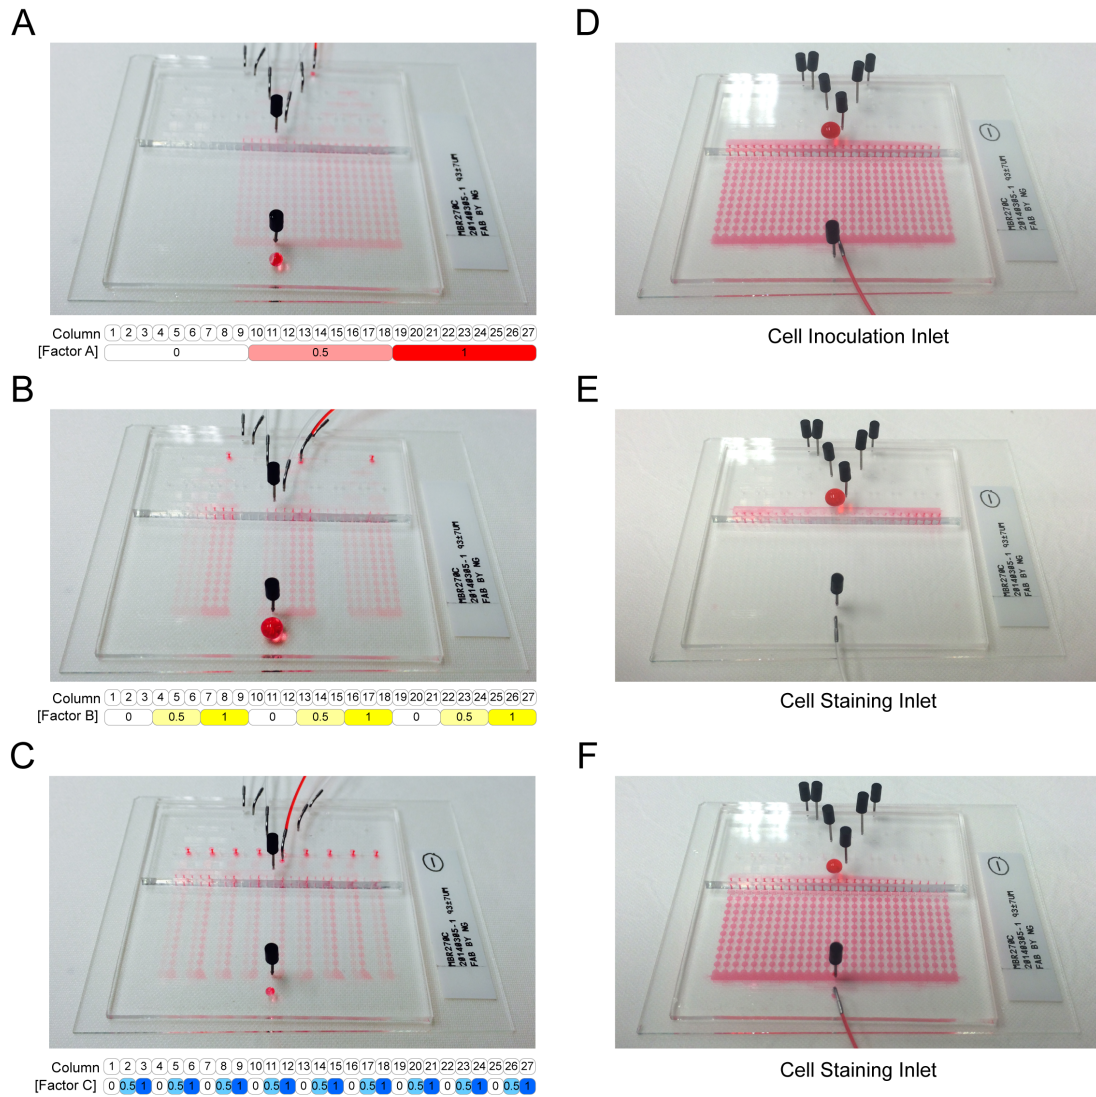

**Supplementary Figure 3 - MBA Dye Loading Validation.** A-C Photographs of dye loading of Ponceau S solution through individual factor inlets A, B, and C (A, B and C, respectively). The panel below shows the design concentration levels of factor in each column of the array. D Dye loading through the cell inoculation inlet, with factor/buffer inlets plugged closed. E,F Dye washout (E) and re-loading (F) from the cell staining inlet, with factor/buffer inlets plugged closed.

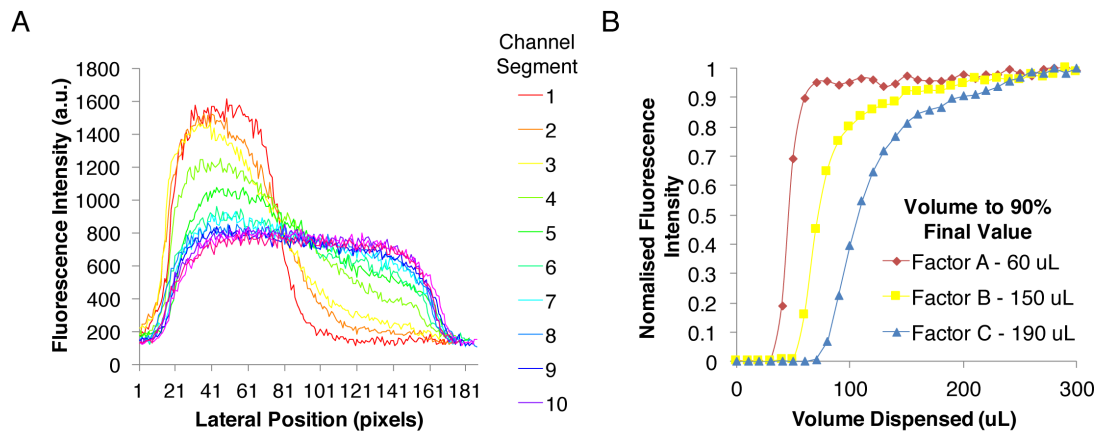

**Supplementary Figure 4 - Dynamic Filling and Diffusive Mixing of Alexa Fluor 488-labelled Heparin in the MBA.** **A** Progression of diffusive mixing in the MBA. Pixel intensity profiles were measured across successive microchannel segments during diffusive mixing. Pixel intensity was measured across the channel width in successive segments. **B** Dynamic tracking of establishment of the maximum concentration levels in each of the MBA factor channels A, B and C is shown. Evolution of fluorescence was tracked starting from the beginning of syringe pump flow, for 1 hour at 300  $\mu\text{L}/\text{h}$  total flowrate. Volume to 90% final value is shown for each factor channel. All factor channels reached the steady state value within 300  $\mu\text{L}$  volume delivery.

A

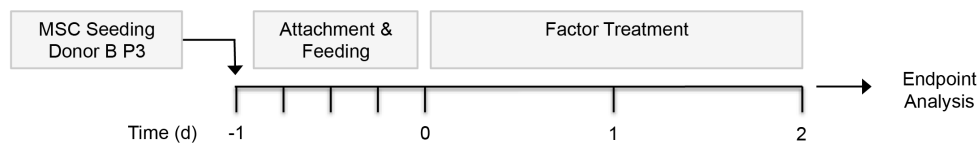

B

| Column   | 1 | 2  | 3  | 4 | 5  | 6  | 7 | 8  | 9  | 10 | 11 | 12 | 13 | 14 | 15 | 16 | 17 | 18 | 19 | 20 | 21 | 22 | 23 | 24 | 25 | 26 | 27 | Carrier   |
|----------|---|----|----|---|----|----|---|----|----|----|----|----|----|----|----|----|----|----|----|----|----|----|----|----|----|----|----|-----------|
| [HS8]    |   |    |    |   | 0  |    |   |    |    |    |    |    |    |    |    | 25 |    |    |    |    |    |    |    |    |    |    | 50 | +0.1% BSA |
| [FGF-2]  | 0 | 25 |    |   |    | 50 |   |    |    | 0  | 25 |    |    |    | 50 |    |    |    | 0  | 25 |    |    |    | 50 |    |    |    | +0.1% BSA |
| [SU5402] | 0 | 25 | 50 | 0 | 25 | 50 | 0 | 25 | 50 | 0  | 25 | 50 | 0  | 25 | 50 | 0  | 25 | 50 | 0  | 25 | 50 | 0  | 25 | 50 | 0  | 25 | 50 | +30% FBS  |

Final Background Medium: DMEM-LG +10% FBS +4 mM L-Gln +1% Pen/Strep +0.067% BSA

|        |     | Ki67+ Nuclei |    |    |     |    |    |     |    |   |     |    |    |     |    |    |     |     |    |     |    |    |     |    |    |     |     |    | Scale |
|--------|-----|--------------|----|----|-----|----|----|-----|----|---|-----|----|----|-----|----|----|-----|-----|----|-----|----|----|-----|----|----|-----|-----|----|-------|
| Column | Row | 1            | 2  | 3  | 4   | 5  | 6  | 7   | 8  | 9 | 10  | 11 | 12 | 13  | 14 | 15 | 16  | 17  | 18 | 19  | 20 | 21 | 22  | 23 | 24 | 25  | 26  | 27 |       |
| 1      | 1   | 97           | 57 | 11 | 186 | 76 | 7  | 162 | 79 | 6 | 140 | 75 | 8  | 131 | 55 | 9  | 135 | 95  | 18 | 172 | 63 | 11 | 169 | 73 | 7  | 169 | 68  | 9  | 220   |
| 2      | 1   | 92           | 52 | 6  | 203 | 54 | 8  | 212 | 91 | 6 | 133 | 51 | 3  | 169 | 69 | 2  | 134 | 87  | 20 | 210 | 85 | 3  | 178 | 93 | 6  | 152 | 67  | 19 | 193   |
| 3      | 1   | 105          | 42 | 6  | 195 | 66 | 11 | 197 | 66 | 2 | 138 | 54 | 8  | 154 | 49 | 10 | 202 | 65  | 23 | 220 | 54 | 6  | 148 | 48 | 8  | 163 | 66  | 11 | 165   |
| 4      | 1   | 54           | 23 | 10 | 214 | 76 | 8  | 212 | 67 | 4 | 104 | 47 | 7  | 130 | 58 | 7  | 138 | 116 | 18 | 193 | 64 | 6  | 175 | 64 | 8  | 174 | 46  | 9  | 138   |
| 5      | 1   | 91           | 38 | 8  | 212 | 73 | 9  | 202 | 52 | 4 | 89  | 40 | 2  | 148 | 41 | 6  | 135 | 85  | 19 | 153 | 62 | 13 | 187 | 61 | 5  | 211 | 86  | 13 | 111   |
| 6      | 1   | 56           | 48 | 6  | 162 | 46 | 5  | 148 | 36 | 8 | 119 | 28 | 3  | 98  | 34 | 3  | 96  | 83  | 7  | 182 | 76 | 4  | 212 | 92 | 7  | 186 | 66  | 5  | 83    |
| 7      | 1   | 45           | 25 | 7  | 174 | 56 | 5  | 130 | 40 | 5 | 60  | 22 | 6  | 169 | 52 | 4  | 101 | 77  | 7  | 169 | 79 | 4  | 182 | 94 | 13 | 200 | 58  | 3  | 56    |
| 8      | 1   | 67           | 31 | 6  | 160 | 49 | 2  | 182 | 34 | 4 | 94  | 24 | 5  | 145 | 68 | 11 | 136 | 91  | 13 | 144 | 56 | 13 | 168 | 71 | 22 | 143 | 94  | 13 | 28    |
| 9      | 1   | 68           | 28 | 2  | 166 | 53 | 2  | 167 | 36 | 7 | 65  | 23 | 3  | 199 | 77 | 12 | 184 | 95  | 6  | 142 | 63 | 4  | 169 | 75 | 6  | 171 | 110 | 5  | 1     |
| 10     | 1   | 44           | 43 | 1  | 166 | 45 | 2  | 123 | 20 | 4 | 70  | 23 | 3  | 182 | 73 | 11 | 167 | 106 | 17 | 185 | 58 | 2  | 144 | 51 | 8  | 180 | 60  | 3  | QCF   |

| Average | 72 | 39 | 6.3 | 184 | 59 | 5.9 | 174 | 52 | 5 | 101 | 39 | 4.8 | 153 | 58 | 7.5 | 143 | 90 | 15 | 177 | 66 | 6.6 | 173 | 72 | 9 | 175 | 72 | 9 |
|---------|----|----|-----|-----|----|-----|-----|----|---|-----|----|-----|-----|----|-----|-----|----|----|-----|----|-----|-----|----|---|-----|----|---|
|---------|----|----|-----|-----|----|-----|-----|----|---|-----|----|-----|-----|----|-----|-----|----|----|-----|----|-----|-----|----|---|-----|----|---|

|        |     | Total Nuclei |     |     |     |     |     |     |     |     |     |     |     |     |     |     |     |     |     |     |     |     |     |     |     |     |     |     | Scale |
|--------|-----|--------------|-----|-----|-----|-----|-----|-----|-----|-----|-----|-----|-----|-----|-----|-----|-----|-----|-----|-----|-----|-----|-----|-----|-----|-----|-----|-----|-------|
| Column | Row | 1            | 2   | 3   | 4   | 5   | 6   | 7   | 8   | 9   | 10  | 11  | 12  | 13  | 14  | 15  | 16  | 17  | 18  | 19  | 20  | 21  | 22  | 23  | 24  | 25  | 26  | 27  |       |
| 1      | 1   | 336          | 383 | 318 | 474 | 411 | 401 | 427 | 412 | 297 | 381 | 399 | 259 | 315 | 233 | 242 | 329 | 353 | 338 | 465 | 389 | 291 | 403 | 435 | 313 | 462 | 413 | 306 | 572   |
| 2      | 1   | 273          | 372 | 340 | 463 | 381 | 377 | 482 | 407 | 356 | 465 | 393 | 299 | 355 | 295 | 199 | 393 | 358 | 327 | 483 | 388 | 326 | 464 | 382 | 278 | 436 | 427 | 310 | 522   |
| 3      | 1   | 395          | 420 | 337 | 429 | 378 | 358 | 479 | 416 | 353 | 468 | 370 | 339 | 364 | 267 | 179 | 428 | 336 | 339 | 515 | 384 | 291 | 426 | 455 | 366 | 486 | 415 | 320 | 471   |
| 4      | 1   | 341          | 381 | 365 | 460 | 368 | 317 | 520 | 368 | 327 | 453 | 364 | 289 | 375 | 221 | 201 | 335 | 372 | 318 | 506 | 397 | 306 | 475 | 417 | 330 | 514 | 373 | 222 | 421   |
| 5      | 1   | 352          | 394 | 349 | 505 | 389 | 298 | 474 | 340 | 310 | *   | 295 | 286 | 332 | 203 | 168 | 294 | 318 | 338 | 456 | 330 | 353 | 466 | 397 | 384 | 572 | 460 | 274 | 370   |
| 6      | 1   | 343          | 354 | 308 | 474 | 364 | *   | 446 | 328 | 303 | 369 | 300 | 261 | 259 | 215 | 173 | 270 | 326 | 292 | 459 | 330 | 321 | 535 | 435 | 409 | 563 | 390 | 296 | 320   |
| 7      | 1   | 323          | *   | 344 | 455 | 383 | 306 | 359 | 295 | 247 | 317 | 238 | 219 | 321 | 279 | 192 | 284 | 258 | 299 | 400 | 389 | 291 | 472 | 439 | 364 | 524 | 458 | 219 | 269   |
| 8      | 1   | 363          | 400 | 306 | 435 | 323 | 270 | 407 | 284 | 256 | 290 | 246 | 240 | 355 | 336 | 276 | 349 | 319 | 223 | 362 | 287 | 281 | 440 | 389 | 361 | 465 | 484 | 304 | 219   |
| 9      | 1   | 381          | 358 | 335 | 433 | 352 | 212 | 372 | 282 | 226 | 261 | 262 | 265 | 515 | 317 | 214 | 429 | 349 | 329 | 359 | 323 | 251 | 445 | 398 | 298 | 430 | 414 | 220 | 168   |
| 10     | 1   | 389          | 389 | 256 | 424 | 285 | 193 | 466 | 246 | 251 | 363 | 307 | 264 | 424 | 345 | 291 | 443 | 386 | 305 | 434 | 305 | 247 | 383 | 315 | 246 | 488 | 346 | 190 | QCF   |

| Average | 350 | 383 | 326 | 455 | 363 | 304 | 443 | 338 | 293 | 374 | 317 | 272 | 362 | 271 | 214 | 355 | 338 | 311 | 444 | 352 | 296 | 451 | 406 | 335 | 494 | 418 | 266 |
|---------|-----|-----|-----|-----|-----|-----|-----|-----|-----|-----|-----|-----|-----|-----|-----|-----|-----|-----|-----|-----|-----|-----|-----|-----|-----|-----|-----|
|---------|-----|-----|-----|-----|-----|-----|-----|-----|-----|-----|-----|-----|-----|-----|-----|-----|-----|-----|-----|-----|-----|-----|-----|-----|-----|-----|-----|

C

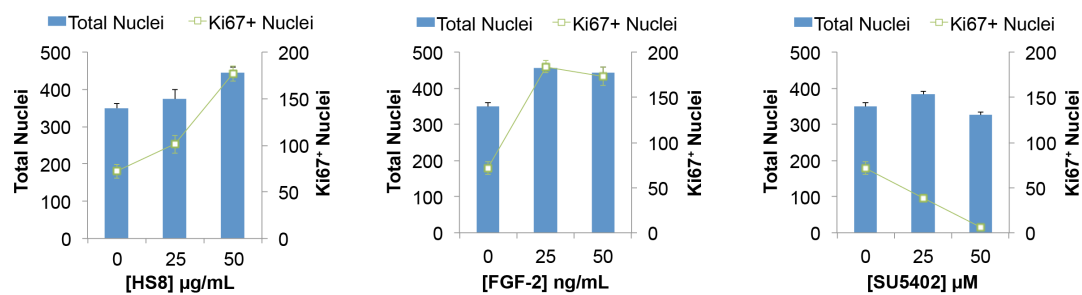

**Supplementary Figure 5 - MBA Combinatorial Screening of HS8, FGF-2 and SU5402 in hMSC Donor B.**

**A** Experimental time course. **B** Top panel: compositions of media in each column of the MBA (HS8, μg/mL; FGF-2, ng/mL; SU5402, μM). Lower panels: Heatmaps of absolute numbers of Ki67+ nuclei, and total nuclei for each chamber in the MBA, corresponding to above compositions. Medium flow was from top (Row 1) to bottom (Row 10) down a column. Mean for each column is given below. QCF: data flagged for quality control issue during image processing. **C** Plots from selected individual MBA columns showing effects of titrations of individual factors (HS8, FGF-2 and SU5402) on total and Ki67+ nuclei. Bars represent mean of all 10 chambers in the relevant column ± SEM.

A

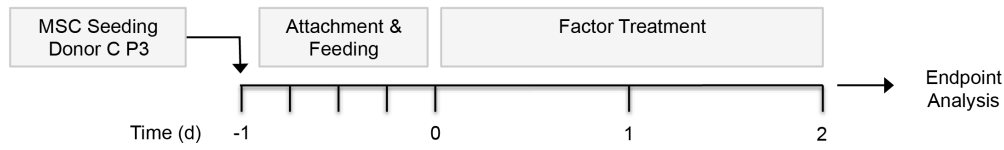

B

| Column                                                                        | 1 | 2  | 3  | 4 | 5  | 6  | 7 | 8  | 9  | 10 | 11 | 12 | 13 | 14 | 15 | 16 | 17 | 18 | 19 | 20 | 21 | 22 | 23        | 24 | 25        | 26 | 27 | Carrier  |
|-------------------------------------------------------------------------------|---|----|----|---|----|----|---|----|----|----|----|----|----|----|----|----|----|----|----|----|----|----|-----------|----|-----------|----|----|----------|
| [HS8+]                                                                        | 0 |    |    |   |    |    |   |    |    |    | 25 |    |    |    |    | 50 |    |    |    |    |    |    | +0.1% BSA |    |           |    |    |          |
| [FGF-2]                                                                       | 0 | 25 |    |   |    | 50 |   |    |    | 0  | 25 |    |    |    | 50 |    |    |    | 0  | 25 |    |    |           | 50 | +0.1% BSA |    |    |          |
| [SU5402]                                                                      | 0 | 25 | 50 | 0 | 25 | 50 | 0 | 25 | 50 | 0  | 25 | 50 | 0  | 25 | 50 | 0  | 25 | 50 | 0  | 25 | 50 | 0  | 25        | 50 | 0         | 25 | 50 | +30% FBS |
| Final Background Medium: DMEM-LG +10% FBS +1% L-Gln +1% Pen/Strep +0.067% BSA |   |    |    |   |    |    |   |    |    |    |    |    |    |    |    |    |    |    |    |    |    |    |           |    |           |    |    |          |

|        |    | Total Ki67+ Nuclei |     |    |     |     |    |     |     |    |    |     |    |    |     |    |    |     |    |     |    |    |    |     |    |     |     |     | Scale |
|--------|----|--------------------|-----|----|-----|-----|----|-----|-----|----|----|-----|----|----|-----|----|----|-----|----|-----|----|----|----|-----|----|-----|-----|-----|-------|
| Column | 1  | 2                  | 3   | 4  | 5   | 6   | 7  | 8   | 9   | 10 | 11 | 12  | 13 | 14 | 15  | 16 | 17 | 18  | 19 | 20  | 21 | 22 | 23 | 24  | 25 | 26  | 27  |     |       |
| Row 1  | 14 | 9                  | 8   | 36 | 9   | 7   | 15 | 4   | 2   | 9  | *  | 4   | 31 | 6  | 8   | 41 | 9  | 5   | 10 | 15  | 5  | 31 | 21 | 6   | 28 | *   | 9   | 68  |       |
| Row 2  | 21 | 12                 | 11  | 34 | 9   | 11  | 25 | 9   | *   | 3  | 5  | 3   | 34 | 9  | 12  | 50 | 23 | 6   | 8  | 7   | 4  | 32 | 15 | 16  | 32 | 5   | *   | 60  |       |
| Row 3  | 13 | 6                  | 3   | 36 | 5   | 4   | 18 | 4   | 6   | 30 | 24 | 10  | 26 | 10 | 2   | 29 | 34 | 9   | 18 | 8   | 4  | 59 | 9  | 5   | 40 | 3   | 16  | 51  |       |
| Row 4  | 24 | 16                 | 5   | 19 | 10  | 9   | 20 | 12  | 6   | 19 | 9  | 7   | 22 | 8  | 13  | 28 | 14 | 7   | 10 | 5   | 10 | 68 | 6  | 2   | 50 | 7   | 10  | 43  |       |
| Row 5  | *  | 10                 | 5   | 19 | 4   | 5   | 37 | 8   | 6   | 8  | 31 | 14  | 33 | 8  | 1   | 35 | 3  | 12  | 29 | 8   | 7  | 39 | 14 | 10  | 42 | 8   | 6   | 35  |       |
| Row 6  | 29 | 2                  | 5   | 14 | 19  | 13  | 24 | 5   | 2   | 6  | 9  | 7   | 17 | 24 | 10  | 41 | 2  | 12  | 27 | 2   | 6  | 39 | 21 | 8   | 37 | 9   | 6   | 26  |       |
| Row 7  | 34 | 4                  | 2   | 19 | 5   | 13  | 16 | 3   | 1   | 7  | 20 | 11  | 19 | *  | 14  | 8  | 7  | 5   | 27 | 2   | 10 | 38 | *  | 6   | 22 | *   | 20  | 18  |       |
| Row 8  | 12 | 21                 | 14  | *  | 19  | 11  | 15 | 10  | 6   | 7  | 7  | 4   | 18 | 18 | 18  | 28 | 16 | 4   | 44 | 12  | 8  | 52 | 8  | 4   | 4  | 9   | 8   | 9   |       |
| Row 9  | 14 | 3                  | *   | 23 | *   | 5   | 7  | 8   | 6   | 4  | 9  | 9   | 28 | 15 | 12  | 12 | 8  | 6   | 33 | 3   | 1  | 31 | 12 | 22  | 21 | 20  | 2   | 1   |       |
| Row 10 | 16 | 4                  | 4   | 35 | 4   | 16  | *  | 12  | 6   | 14 | 12 | 2   | 19 | 5  | 1   | 31 | 5  | 6   | 29 | 15  | 5  | 40 | 16 | 17  | 17 | 2   | 5   | QCF |       |
| Mean   | 20 | 8.7                | 6.3 | 26 | 9.3 | 9.4 | 20 | 7.5 | 4.6 | 11 | 14 | 7.1 | 25 | 11 | 9.1 | 30 | 12 | 7.2 | 24 | 7.7 | 6  | 43 | 14 | 9.6 | 29 | 7.9 | 9.1 |     |       |
| Max    | 34 | 21                 | 14  | 36 | 19  | 16  | 37 | 12  | 6   | 30 | 31 | 14  | 34 | 24 | 18  | 50 | 34 | 12  | 44 | 15  | 10 | 68 | 21 | 22  | 50 | 20  | 20  |     |       |

|        |     | Total Nuclei |     |     |     |    |     |    |    |     |    |    |     |     |     |     |     |    |     |     |    |     |     |    |     |     |    |     | Scale |
|--------|-----|--------------|-----|-----|-----|----|-----|----|----|-----|----|----|-----|-----|-----|-----|-----|----|-----|-----|----|-----|-----|----|-----|-----|----|-----|-------|
| Column | 1   | 2            | 3   | 4   | 5   | 6  | 7   | 8  | 9  | 10  | 11 | 12 | 13  | 14  | 15  | 16  | 17  | 18 | 19  | 20  | 21 | 22  | 23  | 24 | 25  | 26  | 27 |     |       |
| Row 1  | 111 | 94           | 75  | 190 | 130 | 76 | 107 | 80 | 46 | 91  | 61 | 31 | 119 | 110 | 56  | 145 | 79  | 74 | 158 | 74  | 58 | 159 | 89  | 28 | 143 | 128 | 38 | 205 |       |
| Row 2  | 90  | 76           | 58  | 124 | 114 | 44 | 105 | 73 | *  | 97  | 64 | 45 | 125 | 92  | 54  | 155 | 105 | 46 | 147 | 92  | 43 | 170 | 77  | 69 | 126 | 101 | 73 | 183 |       |
| Row 3  | 134 | 83           | 53  | 139 | 78  | 34 | 102 | 90 | 52 | 113 | 55 | 35 | 98  | 88  | 55  | 109 | 98  | 57 | 133 | 74  | 40 | 191 | 100 | 51 | 170 | 137 | 67 | 160 |       |
| Row 4  | 104 | 96           | 40  | 125 | 85  | 36 | 95  | 49 | 54 | 118 | 45 | 29 | 108 | 120 | 39  | 139 | 85  | 49 | 160 | 61  | 55 | 198 | 114 | 44 | 180 | 120 | 39 | 138 |       |
| Row 5  | 114 | 69           | 53  | 119 | 70  | 35 | 120 | 66 | 47 | 109 | 92 | 53 | 128 | 136 | 55  | 157 | 113 | 84 | 163 | 85  | 60 | 185 | 105 | 57 | 175 | 116 | 69 | 116 |       |
| Row 6  | 139 | 96           | 55  | 112 | 74  | 66 | 101 | 59 | 44 | 81  | 84 | 52 | 91  | 115 | 82  | 158 | 86  | 54 | 177 | 79  | 43 | 205 | 113 | 42 | 136 | 120 | 51 | 93  |       |
| Row 7  | 124 | 104          | 77  | 94  | 100 | 33 | 116 | 58 | 44 | 131 | 75 | 36 | 118 | 156 | 116 | 131 | 100 | 80 | 160 | 101 | 49 | 180 | 80  | 62 | 144 | 93  | 42 | 71  |       |
| Row 8  | 113 | 128          | 62  | 108 | 148 | 45 | 117 | 77 | 50 | 94  | 45 | 26 | 117 | 131 | 47  | 168 | 157 | 88 | 178 | 87  | 61 | 175 | 79  | 42 | 150 | 91  | 82 | 48  |       |
| Row 9  | 138 | 112          | 115 | 170 | 122 | 37 | 74  | 71 | 50 | 89  | 77 | 57 | 134 | 116 | 62  | 132 | 113 | 89 | 174 | 83  | 45 | 152 | 85  | 55 | 118 | 102 | 58 | 26  |       |
| Row 10 | 95  | 81           | 44  | 134 | 76  | 62 | 97  | 91 | 74 | 93  | 68 | 30 | 137 | 99  | 53  | 179 | 126 | 76 | 175 | 108 | 47 | 154 | 95  | 59 | 126 | 67  | 47 | QCF |       |
| Mean   | 116 | 94           | 63  | 132 | 100 | 47 | 103 | 71 | 51 | 102 | 67 | 39 | 118 | 116 | 62  | 147 | 106 | 70 | 163 | 84  | 50 | 177 | 94  | 51 | 147 | 108 | 57 |     |       |
| Max    | 139 | 128          | 115 | 190 | 148 | 76 | 120 | 91 | 74 | 131 | 92 | 57 | 137 | 156 | 116 | 179 | 157 | 89 | 178 | 108 | 61 | 205 | 114 | 69 | 180 | 137 | 82 |     |       |

C

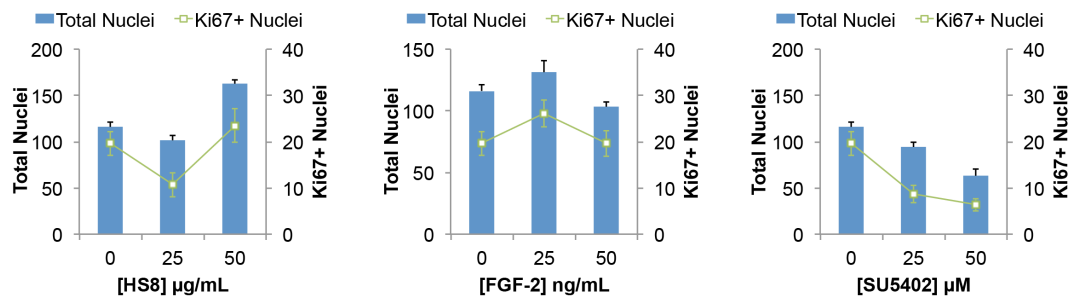

**Supplementary Figure 6 - MBA Combinatorial Screening of HS8, FGF-2 and SU5402 in hMSC Donor C.**

**A** Experimental time course. **B** Top panel: compositions of media in each column of the MBA (HS8,  $\mu\text{g/mL}$ ; FGF-2,  $\text{ng/mL}$ ; SU5402,  $\mu\text{M}$ ). Lower panels: Heatmaps of absolute numbers of Ki67+ nuclei, and total nuclei for each chamber in the MBA, corresponding to above compositions. Medium flow was from top (Row 1) to bottom (Row 10) down a column. Mean for each column is given below. QCF: data flagged for quality control issue during image processing. **C** Plots from selected individual MBA columns showing effects of titrations of individual factors (HS8, FGF-2 and SU5402) on total and Ki67+ nuclei. Bars represent mean of all 10 chambers in the relevant column  $\pm$  SEM.

A

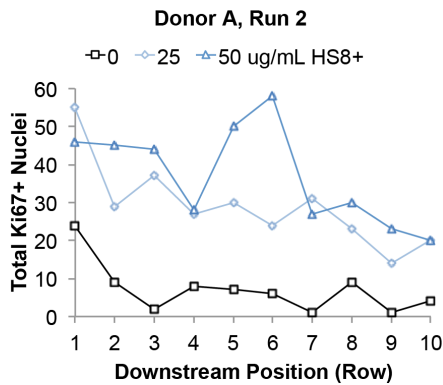

A'

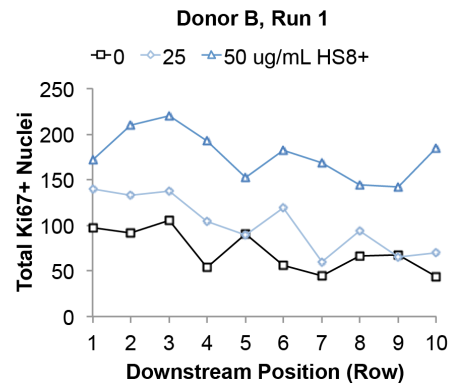

B

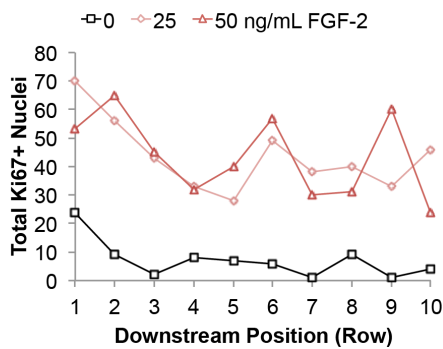

B'

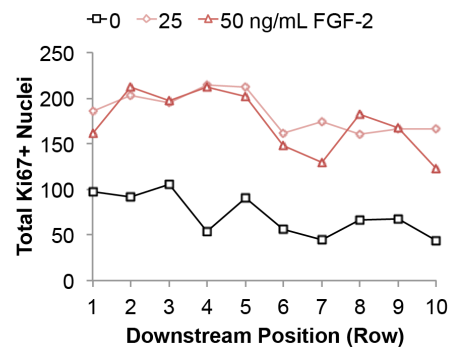

C

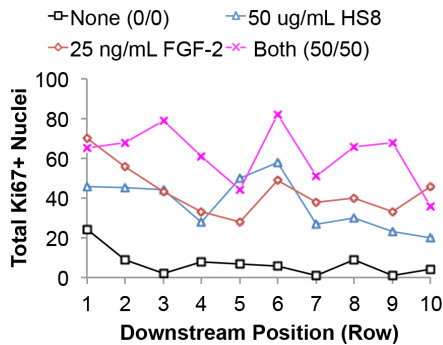

C'

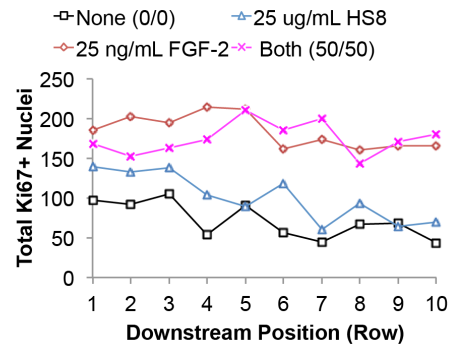

**Supplementary Figure 7 – Paracrine profiles of cell responses in replicate runs and donors. A-C** Plots for Donor A, Run 2, of Ki67+ nuclei in each chamber versus downstream position (Row coordinate of the chamber) for **A** increasing concentrations of HS8, **B** increasing concentrations of FGF-2, and **C** combinations of HS8 and FGF-2. **A'-C'** Corresponding plots for Donor B, Run 1.



**SUPPLEMENTARY TABLES****Supplementary Table 1 – RT-qPCR Probe Information.**

| <b>Gene Symbol</b> | <b>Gene Name</b>                                 | <b>Assay ID</b> | <b>Reference Sequence</b>                                |
|--------------------|--------------------------------------------------|-----------------|----------------------------------------------------------|
| <i>ALPL</i>        | alkaline phosphatase, liver/bone/kidney          | Hs01029144_m1   | NM_000478.4<br>NM_001127501.2<br>NM_001177520.1          |
| <i>IBSP</i>        | integrin-binding sialoprotein                    | Hs00173720_m1   | NM_004967.3                                              |
| <i>PPARG</i>       | peroxisome proliferator-activated receptor gamma | Hs01115513_m1   | NM_005037.5<br>NM_015869.4<br>NM_138711.3<br>NM_138712.3 |
| <i>CEBPA</i>       | CCAAT/enhancer binding protein (C/EBP), alpha    | Hs00269972_s1   | NM_004364.3                                              |
| <i>SOX9</i>        | SRY (sex determining region Y)-box 9             | Hs01001343_g1   | NM_000346.3                                              |
| <i>COL2A1</i>      | collagen, type II, alpha 1                       | Hs00264051_m1   | NM_001844.4<br>NM_033150.2                               |
| <i>ACAN</i>        | aggrecan                                         | Hs00153936_m1   | NM_001135.3<br>NM_013227.3                               |
| <i>ACTB</i>        | actin, beta                                      | Hs01060665_g1   | NM_001101.3                                              |
